# Supplementary material for: Development of a Cannabinoid-Based Photoaffinity Probe to Determine the Δ8/9-Tetrahydrocannabinol Protein Interaction Landscape in Neuroblastoma Cells
Source: PubMed Central journal article supplement (PMC6038054; doi:10.1089/can.2018.0003), 2018-07-01

## Supplementary Data

**Supplementary Table S1. Putative Protein Targets of Probe 1**

| Gene name | Protein name                                                                       | UV-enrichment |
|-----------|------------------------------------------------------------------------------------|---------------|
| Tmem97    | Transmembrane protein 97                                                           | 59.6          |
| Lrrc59    | Leucine-rich repeat containing 59                                                  | 20.3          |
| Slc25a11  | Solute carrier family 25 (mitochondrial carrier oxoglutarate carrier), member 11   | 17.0          |
| Tomm22    | Translocase of outer mitochondrial membrane 22 homolog                             | 16.5          |
| Sel1l     | Sel-1 suppressor of lin-12-like                                                    | 11.1          |
| Lbr       | lamin B receptor                                                                   | 10.3          |
| Rab15     | RAB15, member RAS oncogene family                                                  | 10.0          |
| Ndufa9    | NADH dehydrogenase (ubiquinone) 1 alpha subcomplex, 9                              | 6.5           |
| Mtco2     | Cytochrome c oxidase subunit 2                                                     | 6.5           |
| Slc25a19  | Solute carrier family 25 (mitochondrial thiamine pyrophosphate carrier), member 19 | 5.5           |
| Txndc15   | Thioredoxin domain containing 15                                                   | 5.5           |
| Mtch2     | Mitochondrial carrier 2                                                            | 5.3           |
| Lman2     | Lectin, mannose-binding 2                                                          | 5.3           |
| Vdac2     | Voltage-dependent anion channel 2                                                  | 5.3           |
| Sec11c    | SEC11 homolog C, signal peptidase complex subunit                                  | 5.1           |
| Rpn2      | ribophorin II                                                                      | 5.1           |
| Atp5 j2   | ATP synthase, H <sup>+</sup> transporting, mitochondrial F0 complex, subunit F2    | 5.0           |
| Fads2     | Fatty acid desaturase 2                                                            | 5.0           |
| Sgpl1     | Sphingosine phosphate lyase 1                                                      | 4.8           |
| Ssrp1     | Structure-specific recognition protein 1                                           | 4.7           |
| Rab14     | RAB14, member RAS oncogene family                                                  | 4.5           |
| Atp5o     | ATP synthase, H <sup>+</sup> transporting, mitochondrial F1 complex, O subunit     | 4.4           |
| Slc25a39  | Solute carrier family 25, member 39)                                               | 4.4           |
| Tmem87a   | Transmembrane protein 87A                                                          | 4.3           |
| Gtpbp8    | GTP-binding protein 8 (putative)                                                   | 4.3           |
| Gosr2     | Golgi SNAP receptor complex member 2                                               | 4.2           |
| Hk1       | Hexokinase 1                                                                       | 4.2           |
| Hba       | Hemoglobin alpha-chain complex                                                     | 4.1           |
| Hk2       | Hexokinase 2                                                                       | 4.0           |
| Ptges2    | Prostaglandin E synthase 2                                                         | 4.0           |
| Coq3      | Coenzyme Q3 methyltransferase                                                      | 3.9           |
| Steap3    | STEAP family member 3                                                              | 3.9           |
| Atp6v0a1  | ATPase, H <sup>+</sup> transporting, lysosomal V0 subunit A1                       | 3.7           |
| Mthfd1l   | Methylenetetrahydrofolate dehydrogenase (NADP+ dependent) 1-like                   | 3.7           |
| Bnip1     | BCL2/adenovirus E1B interacting protein 1                                          | 3.7           |
| Tubb5     | Tubulin, beta 5 class I                                                            | 3.5           |
| Cnih4     | Cornichon family AMPA receptor auxiliary protein 4                                 | 3.4           |
| Usmg5     | Upregulated during skeletal muscle growth 5                                        | 3.4           |
| Por       | P450 (cytochrome) oxidoreductase                                                   | 3.4           |
| Tubb3     | Tubulin, beta 3 class III                                                          | 3.4           |
| Rab1b     | RAB1B, member RAS oncogene family                                                  | 3.3           |
| Pigs      | Phosphatidylinositol glycan anchor biosynthesis, class 5                           | 3.3           |
| Yif1b     | Yip1 interacting factor homolog B                                                  | 3.3           |
| Acsl6     | Acyl-CoA synthetase long-chain family member 6                                     | 3.3           |
| Msmo1     | Methylsterol monooxygenase 1                                                       | 3.2           |
| Ssr3      | Signal sequence receptor, gamma                                                    | 3.2           |
| lap       | Intestinal-type alkaline phosphatase                                               | 3.2           |
| Pcyox1    | Prenylcysteine oxidase 1                                                           | 3.1           |
| Mmgt1     | Membrane magnesium transporter 1                                                   | 3.0           |
| Gaa       | Glucosidase, alpha, acid                                                           | 3.0           |
| Uqcrcq    | Ubiquinol-cytochrome c reductase, complex III subunit VII                          | 3.0           |
| Nup93     | Nucleoporin 93                                                                     | 2.9           |
| Epdr1     | Ependymin-related protein 1                                                        | 2.9           |
| Eef1b     | Elongation factor 1-beta                                                           | 2.9           |
| Lgals1    | Lectin, galactose binding, soluble 1                                               | 2.9           |
| Pgap1     | Post-GPI attachment to proteins 1                                                  | 2.9           |

(continued)

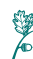

**Supplementary Table S1. (Continued)**

| Gene name | Protein name                                                                               | UV-enrichment |
|-----------|--------------------------------------------------------------------------------------------|---------------|
| Mff       | Mitochondrial fission factor                                                               | 2.9           |
| Anxa6     | Annexin A6                                                                                 | 2.8           |
| Gpr107    | G protein-coupled receptor 107                                                             | 2.8           |
| Adpgk     | ADP-dependent glucokinase                                                                  | 2.8           |
| Tmx1      | Thioredoxin-related transmembrane protein 1                                                | 2.8           |
| Hebp1     | Heme binding protein 1                                                                     | 2.8           |
| Acs11     | Acyl-CoA synthetase long-chain family member 1                                             | 2.8           |
| Cpox      | Coproporphyrinogen oxidase                                                                 | 2.7           |
| Dhrs7     | Dehydrogenase/reductase (SDR family) member 7                                              | 2.7           |
| Ptdss1    | Phosphatidylserine synthase 1                                                              | 2.7           |
| Surf4     | Surfeit gene 4                                                                             | 2.7           |
| Timmdc1   | Translocase of inner mitochondrial membrane domain containing 1                            | 2.7           |
| Rdh11     | Retinol dehydrogenase 11                                                                   | 2.7           |
| Cers4     | Ceramide synthase 4                                                                        | 2.7           |
| Fh        | Fetal hematoma                                                                             | 2.7           |
| Slc30a5   | Solute carrier family 30 (zinc transporter), member 5                                      | 2.7           |
| Vapa      | Vesicle-associated membrane protein, associated protein A                                  | 2.6           |
| Slc3a2    | Solute carrier family 3 (activators of dibasic and neutral amino acid transport), member 2 | 2.6           |
| Emd       | Emerin                                                                                     | 2.6           |
| Stom      | Stomatin                                                                                   | 2.5           |
| Clptm1    | Cleft lip and palate-associated transmembrane protein 1                                    | 2.5           |
| Uqcrc1    | Ubiquinol-cytochrome c reductase core protein 1                                            | 2.5           |
| Trp53i11  | Transformation-related protein 53 inducible protein 11                                     | 2.5           |
| Gtpbp4    | GTP-binding protein 4                                                                      | 2.5           |
| Cdipt     | CDP-diacylglycerol—inositol 3-phosphatidyltransferase (phosphatidylinositol synthase)      | 2.5           |
| Hsd17b11  | Hydroxysteroid (17-beta) dehydrogenase 11                                                  | 2.5           |
| Aifm2     | Apoptosis-inducing factor, mitochondrion-associated 2                                      | 2.5           |
| Sec11a    | SEC11 homolog A, signal peptidase complex subunit                                          | 2.5           |
| Rab4a     | RAB4A, member RAS oncogene family                                                          | 2.4           |
| Syngn3    | Synaptogyrin 3                                                                             | 2.4           |
| Arl6ip5   | ADP-ribosylation factor-like 6 interacting protein 5                                       | 2.4           |
| Atp2a1    | ATPase, Ca <sup>++</sup> transporting, cardiac muscle, fast twitch 1                       | 2.4           |
| Pgrmc2    | Progesterone receptor membrane component 2                                                 | 2.4           |
| Tmx3      | Thioredoxin-related transmembrane protein 3                                                | 2.4           |
| Tmx4      | Thioredoxin-related transmembrane protein 4                                                | 2.4           |
| Krtcap2   | Keratinocyte-associated protein 2                                                          | 2.4           |
| Cox5a     | Cytochrome c oxidase subunit Va                                                            | 2.4           |
| Wdr74     | WD repeat domain 74                                                                        | 2.4           |
| Gnpat     | Glyceronephosphate O-acyltransferase                                                       | 2.4           |
| Copz1     | Coatamer protein complex, subunit zeta 1                                                   | 2.3           |
| Tmem19    | Transmembrane protein 19                                                                   | 2.3           |
| Atp2b1    | ATPase, Ca <sup>++</sup> transporting, plasma membrane 1                                   | 2.3           |
| Ncstn     | Nicastrin                                                                                  | 2.3           |
| Rer1      | Retention in endoplasmic reticulum sorting receptor 1                                      | 2.3           |
| Vamp3     | Vesicle-associated membrane protein 3                                                      | 2.3           |
| Nptn      | Neuroplastin                                                                               | 2.3           |
| Gls       | Glutaminase                                                                                | 2.3           |
| Rbm14     | RNA binding motif protein 14                                                               | 2.3           |
| Rack1     | Receptor for activated C kinase 1                                                          | 2.3           |
| Stx7      | Syntaxin 7                                                                                 | 2.2           |
| Abhd16a   | Abhydrolase domain containing 16A                                                          | 2.2           |
| Slc25a25  | Solute carrier family 25 (mitochondrial carrier, phosphate carrier), member 25             | 2.2           |
| Fam114a2  | Family with sequence similarity 114, member A2                                             | 2.2           |
| Sec22b    | SEC22 homolog B, vesicle trafficking protein                                               | 2.2           |
| Kdelr2    | KDEL (Lys-Asp-Glu-Leu) endoplasmic reticulum protein retention receptor 2                  | 2.2           |
| Nipsnap1  | Nipsnap homolog 1                                                                          | 2.2           |
| Itgb1     | Integrin beta 1 (fibronectin receptor beta)                                                | 2.2           |
| Letmd1    | LETM1 domain containing 1                                                                  | 2.2           |
| Gnb1      | Guanine nucleotide binding protein (G protein), beta 1                                     | 2.2           |
| Lpcat3    | Lysophosphatidylcholine acyltransferase 3                                                  | 2.2           |
| Syt1      | Synaptotagmin I                                                                            | 2.2           |
| Slc25a32  | Solute carrier family 25, member 32                                                        | 2.2           |
| Rab39b    | RAB39B, member RAS oncogene family                                                         | 2.2           |
| Preb      | Prolactin regulatory element binding                                                       | 2.2           |
| Slc16a3   | Solute carrier family 16 (monocarboxylic acid transporters), member 3                      | 2.1           |
| Abhd6     | Abhydrolase domain containing 6                                                            | 2.1           |

*(continued)*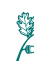

**Supplementary Table S1. (Continued)**

| Gene name | Protein name                                                                                                                          | UV-enrichment |
|-----------|---------------------------------------------------------------------------------------------------------------------------------------|---------------|
| Rab18     | RAB18, member RAS oncogene family                                                                                                     | 2.1           |
| Hadha     | hydroxyacyl-Coenzyme A dehydrogenase/3-ketoacyl-Coenzyme A thiolase/enoyl-Coenzyme A hydratase (trifunctional protein), alpha subunit | 2.1           |
| Fam134c   | Family with sequence similarity 134, member C                                                                                         | 2.1           |
| Slc25a20  | Solute carrier family 25 (mitochondrial carnitine/acylcarnitine translocase), member 20                                               | 2.1           |
| Uchl1     | Ubiquitin carboxy-terminal hydrolase L1                                                                                               | 2.1           |
| Hsd17b12  | Hydroxysteroid (17-beta) dehydrogenase 12                                                                                             | 2.1           |
| Vkorc11l  | Vitamin K epoxide reductase complex, subunit 1-like 1                                                                                 | 2.1           |
| Pdhb      | Pyruvate dehydrogenase (lipoamide) beta                                                                                               | 2.1           |
| Timm17a   | Translocase of inner mitochondrial membrane 17a                                                                                       | 2.1           |
| Mtnd1     | NADH-ubiquinone oxidoreductase chain 1                                                                                                | 2.0           |
| Bcap29    | B cell receptor-associated protein 29                                                                                                 | 2.0           |
| Pam16     | Presequence translocase-associated motor 16 homolog                                                                                   | 2.0           |
| Fkbp8     | FK506-binding protein 8                                                                                                               | 2.0           |
| Cox4i1    | Cytochrome c oxidase subunit IV isoform 1                                                                                             | 2.0           |
| Reep5     | Receptor accessory protein 5                                                                                                          | 1.5           |

Proteins that were  $>2\times$  abundant after UV-irradiation of probe 1 are shown here. Gene and protein names and the ratio probe versus probe (No UV) of these proteins are listed.  
UV, ultraviolet.

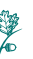

Supplement: Supp_Table1.pdf [file Supp_Table1.pdf]
