# Supplementary material for: Development of a Cannabinoid-Based Photoaffinity Probe to Determine the Δ8/9-Tetrahydrocannabinol Protein Interaction Landscape in Neuroblastoma Cells
Source: PubMed Central journal article supplement (PMC6038054; doi:10.1089/can.2018.0003), 2018-07-01

**Supplementary Table S2. THC Putative Protein Targets with Less Than 50% Inhibition**

|                 | Gene name | Protein name                         | % Inhibition $\pm$ SEM |
|-----------------|-----------|--------------------------------------|------------------------|
| $\Delta^8$ -THC | Lin28a    | Protein lin-28 homolog A             | 25 $\pm$ 2             |
|                 | Ssrp1     | FACT complex subunit SSRP1           | 25 $\pm$ 7             |
|                 | Asna1     | ATPase Asna1                         | 21 $\pm$ 2             |
|                 | Pdia4     | Protein disulfide-isomerase A4       | 11 $\pm$ 3             |
| $\Delta^9$ -THC | Rhoc      | Rho-related GTP-binding protein RhoC | 41 $\pm$ 7             |
|                 | Ldah      | Lipid-droplet-associated hydrolase   | 39 $\pm$ 6             |
|                 | Ppa1      | Inorganic pyrophosphatase            | 39 $\pm$ 7             |

Proteins that were inhibited <50% were excluded from gene ontology analysis. Gene and protein names of these proteins are listed here. SEM, standard error of the mean.

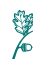

Supplement: Supp_Table2.pdf [file Supp_Table2.pdf]
